# Supplementary material for: Symmetric Allosteric Mechanism of Hexameric Escherichia coli Arginine Repressor Exploits Competition between L-Arginine Ligands and Resident Arginine Residues
Source: PubMed Central journal article supplement (PMC2880562; doi:10.1371/journal.pcbi.1000801), 2010-06-03

Figure S2. Gly103-Asp128 distances.

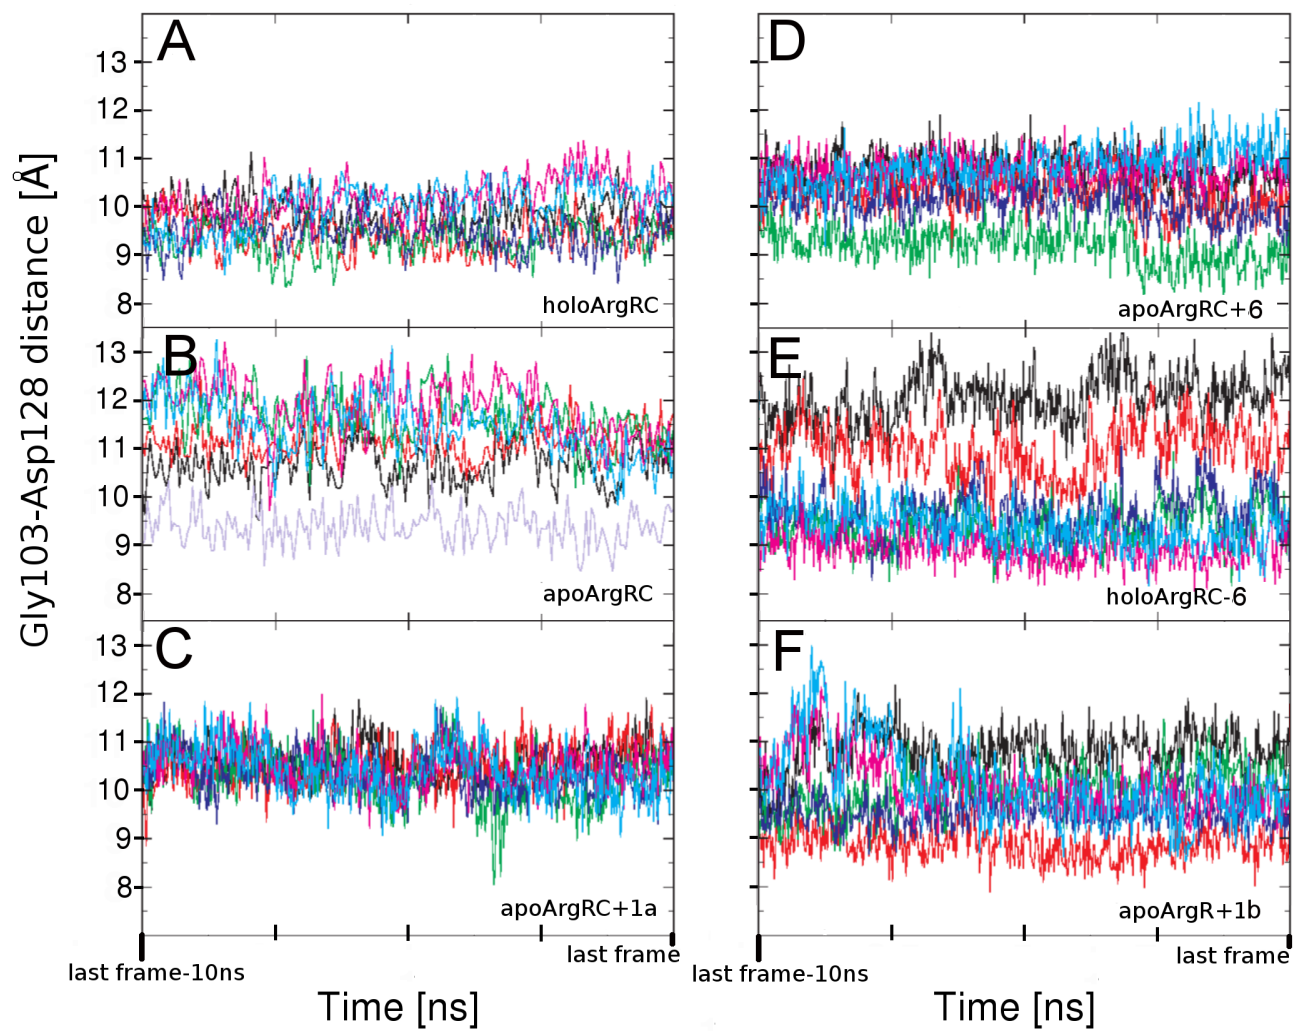

Supplement: pcbi.1000801.s002.pdf [file pcbi.1000801.s002.pdf]
