# Supplementary material for: Symmetric Allosteric Mechanism of Hexameric Escherichia coli Arginine Repressor Exploits Competition between L-Arginine Ligands and Resident Arginine Residues
Source: PubMed Central journal article supplement (PMC2880562; doi:10.1371/journal.pcbi.1000801), 2010-06-03
Supplement: pcbi.1000801.s004.pdf [file pcbi.1000801.s004.pdf]

**Table S1. Energetic contributions.**

| Simulation           | System conformational entropy, kJ/molK | Binding enthalpy per ligand, kJ/mol | Binding free energy per ligand, kJ/mol |
|----------------------|----------------------------------------|-------------------------------------|----------------------------------------|
| holoArgRC            | 64.8 ± 0.4                             | -733 ± 198                          | -241 ± 38                              |
| apoArgRC             | 65.6 ± 0.3                             |                                     |                                        |
| holoArgRC – 5a L-arg | 66.7 ± 0.7                             | -873                                | -415                                   |
| holoArgRC – 5b L-arg | 65.6 ± 0.3                             | -696                                | -313                                   |
| holoArgRC – 5c L-arg | 66.3 ± 0.2                             | -816                                | -377                                   |
| apoArgRC + 1a L-arg  | 66.2 ± 0.3                             | -671                                | -318                                   |
| apoArgRC + 1b L-arg  | 65.6 ± 0.3                             | -818                                | -379                                   |
| apoArgRC + 2a L-arg  | 66.1 ± 0.4                             | not determined                      | -237                                   |
| apoArgRC + 2b L-arg  | 66.7 ± 0.3                             | not determined                      | -264                                   |
| apoArgRC + 2c L-arg  | 65.4 ± 0.2                             | not determined                      | -295                                   |
